# Supplementary material for: Correlation Analysis among the Chemical Composition, Cytotoxic and Antioxidant Activities of <i>Tessaria absinthioides </i>Decoction to Endorse Its Potential Application in Oncology
Source: Preprints.org preprint supplement (doi:10.20944/preprints202409.2314.v1), 2024-09-29
Supplement: Supplementary file 1 [file supplementary]

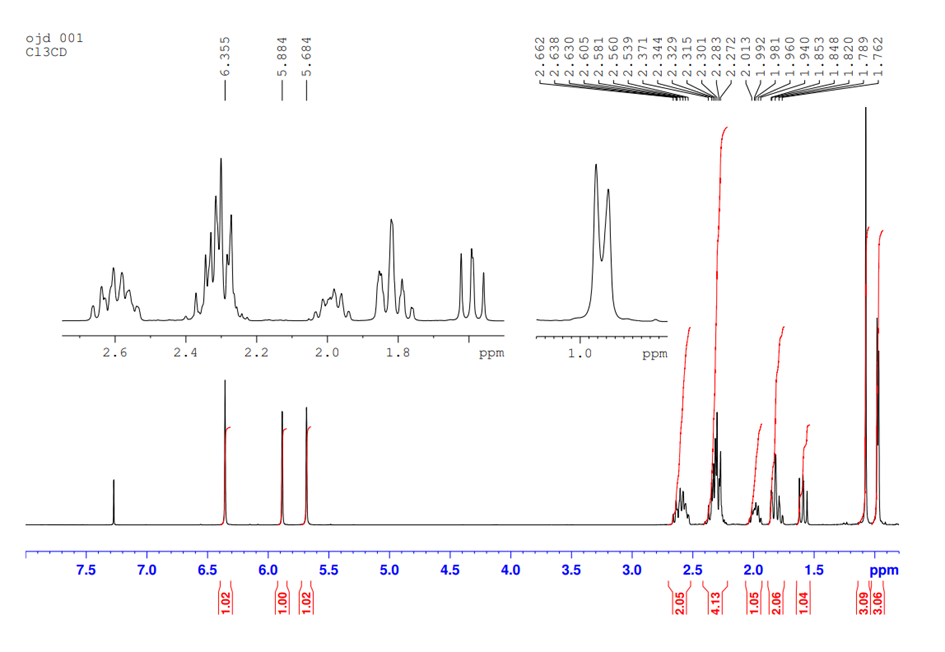


**Suplementary Figure S2. 1H-NMR spectra – Tessaric acid.** Tessaric acid, 1 H NMR (200 MHz, CDCl3) d 6.33 (br s, 1H, H13), d 5.66 (br s, 1H, H130 ), d 5.88 (br s, 1H, H1), d 0.98 (d, J = 7 Hz, 3H, H15), d 1.10 (s, 3H, H14), d 2.58 (m, 1H, H7); Donadel *et al.*, 2005.
