# Supplementary material for: Correlation Analysis among the Chemical Composition, Cytotoxic and Antioxidant Activities of <i>Tessaria absinthioides </i>Decoction to Endorse Its Potential Application in Oncology
Source: Preprints.org preprint supplement (doi:10.20944/preprints202409.2314.v1), 2024-09-29
Supplement: Supplementary file 2 [file 240923_FS1_CPA eigenvalues.docx]

| 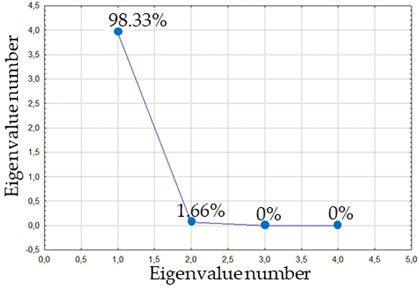 | 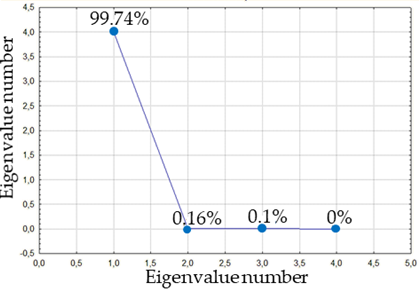 |
| --- | --- |
| (**a**) | (**b**) |

**Suplementary Figure S1. CPA Eigenvalues.** In (a) the eigenvalues estimated by the CPA to cytotoxicity. In (b) the eigenvalues calculated for antioxidant properties.
