# Supplementary material for: Correlation Analysis among the Chemical Composition, Cytotoxic and Antioxidant Activities of <i>Tessaria absinthioides </i>Decoction to Endorse Its Potential Application in Oncology
Source: Preprints.org preprint supplement (doi:10.20944/preprints202409.2314.v1), 2024-09-29
Supplement: Supplementary file 4 [file 240923_TS1_Sporadical Phytochem.docx]

**Supplementary Table S1.** Occasional DETa phytochemicals concentrations.

| **Phenolic group** | **Compound (n=10)** | **Harvest year** | **Concentration (µg/mL)** |
| --- | --- | --- | --- |
| Phenolic acids | synaptic | 2017 | 0.41 |
| syringic | 2019 | 0.02 |
| trans-cinnamic | 2017 | 0.03 |
| Phenylethanoid | tyrosol | 2019 | 0.19 |
| Flavonoids | kaempferol-3-glucoside | 2019 | 0.02 |
| naringenin | 2017 and 2018 | 0.05; 0.30 |
| phloridzin | 2019 | 0.01 |
| procyanidin B1 | 2019 | 0.03 |
| procyanidin B2 | 2019 | 0.03 |
| rutin | 2017 | 0.01 |
