# Supplementary material for: Correlation Analysis among the Chemical Composition, Cytotoxic and Antioxidant Activities of <i>Tessaria absinthioides </i>Decoction to Endorse Its Potential Application in Oncology
Source: Preprints.org preprint supplement (doi:10.20944/preprints202409.2314.v1), 2024-09-29
Supplement: Supplementary file 5 [file 240923_TS2-PEARSON Complete.docx]

**Supplementary Table S2.** Complete PEARSON correlations of phytochemicals and biological properties.

| **Comp** | **Api** | **Caf** | **Cta** | **Cat** | **CQA** | **Ela** | **Epi** | **Fea** | **Gag** | **GiA** | **Hes** | **Lut** | **Myr** | **Nar** | **OHt** | ***p*co** | **Que** | **Q3g** | **Roa** | **Tea** | **Tpi** | **Vaa** | **CYT** | **DPPH** | **FRAP** |
| --- | --- | --- | --- | --- | --- | --- | --- | --- | --- | --- | --- | --- | --- | --- | --- | --- | --- | --- | --- | --- | --- | --- | --- | --- | --- |
| **Api** | 1 | -0,38 | -0,37 | -0,29 | 0,63 | -0,39 | -0,26 | -0,11 | -0,40 | -0,49 | -0,03 | 0,37 | -0,54 | -0,38 | -0,52 | 0,57 | -0,95 | 0,19 | -0,55 | 0,87 | 0,78 | 0,96 | 0,74 | -0,58 | -0,97 |
| **Caf** | -0,38 | 1 | 1,00 | 0,00 | 0,15 | -0,14 | -0,34 | 0,90 | -0,19 | 0,75 | 0,94 | -0,21 | -0,06 | 0,16 | -0,23 | -0,35 | 0,26 | -0,46 | -0,06 | 0,13 | -0,80 | -0,49 | 0,17 | 0,56 | 0,17 |
| **Cfa** | -0,37 | 1,00 | 1 | 0,00 | 0,15 | -0,14 | -0,34 | 0,90 | -0,19 | 0,74 | 0,94 | -0,21 | -0,07 | 0,15 | -0,24 | -0,35 | 0,25 | -0,46 | -0,07 | 0,14 | -0,80 | -0,49 | 0,17 | 0,56 | 0,16 |
| **Cat** | -0,29 | 0,00 | 0,00 | 1 | -0,85 | -0,68 | -0,67 | 0,28 | -0,64 | -0,52 | -0,10 | 0,78 | -0,57 | -0,77 | -0,48 | -0,92 | -0,01 | -0,85 | -0,56 | -0,31 | -0,45 | -0,05 | -0,71 | -0,56 | 0,40 |
| **CQA** | 0,63 | 0,15 | 0,15 | -0,85 | 1 | 0,18 | 0,18 | 0,07 | 0,14 | 0,35 | 0,39 | -0,40 | 0,06 | 0,37 | -0,06 | 0,83 | -0,44 | 0,52 | 0,04 | 0,76 | 0,46 | 0,41 | 0,98 | 0,25 | -0,77 |
| **Ela** | -0,39 | -0,14 | -0,14 | -0,68 | 0,18 | 1 | 0,98 | -0,56 | 1,00 | 0,55 | -0,30 | -0,92 | 0,99 | 0,95 | 0,97 | 0,52 | 0,67 | 0,83 | 0,98 | -0,49 | 0,13 | -0,53 | -0,04 | 0,74 | 0,36 |
| **Epi** | -0,26 | -0,34 | -0,34 | -0,67 | 0,18 | 0,98 | 1 | -0,72 | 0,98 | 0,37 | -0,47 | -0,84 | 0,94 | 0,87 | 0,96 | 0,60 | 0,56 | 0,90 | 0,94 | -0,46 | 0,31 | -0,38 | -0,03 | 0,58 | 0,28 |
| **Fea** | -0,11 | 0,90 | 0,90 | 0,28 | 0,07 | -0,56 | -0,72 | 1 | -0,60 | 0,38 | 0,93 | 0,23 | -0,50 | -0,29 | -0,63 | -0,50 | -0,11 | -0,74 | -0,50 | 0,35 | -0,71 | -0,16 | 0,18 | 0,14 | -0,05 |
| **Fag** | -0,40 | -0,19 | -0,19 | -0,64 | 0,14 | 1,00 | 0,98 | -0,60 | 1 | 0,50 | -0,36 | -0,90 | 0,99 | 0,92 | 0,98 | 0,50 | 0,68 | 0,82 | 0,99 | -0,53 | 0,14 | -0,53 | -0,08 | 0,71 | 0,39 |
| **GiA** | -0,49 | 0,75 | 0,74 | -0,52 | 0,35 | 0,55 | 0,37 | 0,38 | 0,50 | 1 | 0,62 | -0,81 | 0,59 | 0,77 | 0,43 | 0,14 | 0,59 | 0,21 | 0,58 | -0,12 | -0,53 | -0,70 | 0,22 | 0,96 | 0,29 |
| **Hes** | -0,03 | 0,94 | 0,94 | -0,10 | 0,39 | -0,30 | -0,47 | 0,93 | -0,36 | 0,62 | 1 | -0,08 | -0,27 | 0,02 | -0,45 | -0,17 | -0,08 | -0,43 | -0,28 | 0,47 | -0,57 | -0,17 | 0,46 | 0,39 | -0,19 |
| **Lut** | 0,37 | -0,21 | -0,21 | 0,78 | -0,40 | -0,92 | -0,84 | 0,23 | -0,90 | -0,81 | -0,08 | 1 | -0,91 | -1,00 | -0,82 | -0,52 | -0,63 | -0,72 | -0,91 | 0,28 | 0,05 | 0,58 | -0,19 | -0,91 | -0,26 |
| **Myr** | -0,54 | -0,06 | -0,07 | -0,57 | 0,06 | 0,99 | 0,94 | -0,50 | 0,99 | 0,59 | -0,27 | -0,91 | 1 | 0,93 | 0,98 | 0,38 | 0,78 | 0,72 | 1,00 | -0,60 | -0,02 | -0,66 | -0,16 | 0,78 | 0,51 |
| **Nar** | -0,38 | 0,16 | 0,15 | -0,77 | 0,37 | 0,95 | 0,87 | -0,29 | 0,92 | 0,77 | 0,02 | -1,00 | 0,93 | 1 | 0,86 | 0,53 | 0,64 | 0,74 | 0,93 | -0,32 | -0,02 | -0,58 | 0,16 | 0,89 | 0,28 |
| **OHt** | -0,52 | -0,23 | -0,24 | -0,48 | -0,06 | 0,97 | 0,96 | -0,63 | 0,98 | 0,43 | -0,45 | -0,82 | 0,98 | 0,86 | 1 | 0,35 | 0,76 | 0,73 | 0,98 | -0,68 | 0,07 | -0,60 | -0,27 | 0,65 | 0,54 |
| ***p*co** | 0,57 | -0,35 | -0,35 | -0,92 | 0,83 | 0,52 | 0,60 | -0,50 | 0,50 | 0,14 | -0,17 | -0,52 | 0,38 | 0,53 | 0,35 | 1 | -0,27 | 0,88 | 0,37 | 0,43 | 0,77 | 0,39 | 0,73 | 0,19 | -0,60 |
| **Que** | -0,95 | 0,26 | 0,25 | -0,01 | -0,44 | 0,67 | 0,56 | -0,11 | 0,68 | 0,59 | -0,08 | -0,63 | 0,78 | 0,64 | 0,76 | -0,27 | 1 | 0,14 | 0,79 | -0,87 | -0,58 | -0,97 | -0,61 | 0,74 | 0,91 |
| **Q3g** | 0,19 | -0,46 | -0,46 | -0,85 | 0,52 | 0,83 | 0,90 | -0,74 | 0,82 | 0,21 | -0,43 | -0,72 | 0,72 | 0,74 | 0,73 | 0,88 | 0,14 | 1 | 0,72 | -0,04 | 0,65 | 0,04 | 0,35 | 0,37 | -0,17 |
| **Roa** | -0,55 | -0,06 | -0,07 | -0,56 | 0,04 | 0,98 | 0,94 | -0,50 | 0,99 | 0,58 | -0,28 | -0,91 | 1,00 | 0,93 | 0,98 | 0,37 | 0,79 | 0,72 | 1 | -0,61 | -0,03 | -0,66 | -0,18 | 0,78 | 0,52 |
| **Tea** | 0,87 | 0,13 | 0,14 | -0,31 | 0,76 | -0,49 | -0,46 | 0,35 | -0,53 | -0,12 | 0,47 | 0,28 | -0,60 | -0,32 | -0,68 | 0,43 | -0,87 | -0,04 | -0,61 | 1 | 0,41 | 0,77 | 0,89 | -0,32 | -0,95 |
| **Tpi** | 0,78 | -0,80 | -0,80 | -0,45 | 0,46 | 0,13 | 0,31 | -0,71 | 0,14 | -0,53 | -0,57 | 0,05 | -0,02 | -0,02 | 0,07 | 0,77 | -0,58 | 0,65 | -0,03 | 0,41 | 1 | 0,76 | 0,45 | -0,44 | -0,67 |
| **Vaa** | 0,96 | -0,49 | -0,49 | -0,05 | 0,41 | -0,53 | -0,38 | -0,16 | -0,53 | -0,70 | -0,17 | 0,58 | -0,66 | -0,58 | -0,60 | 0,39 | -0,97 | 0,04 | -0,66 | 0,77 | 0,76 | 1 | 0,54 | -0,78 | -0,88 |
| **CYT** | 0,74 | 0,17 | 0,17 | -0,71 | 0,98 | -0,04 | -0,03 | 0,18 | -0,08 | 0,22 | 0,46 | -0,19 | -0,16 | 0,16 | -0,27 | 0,73 | -0,61 | 0,35 | -0,18 | 0,89 | 0,45 | 0,54 | 1 | 0,08 | -0,87 |
| **DPPH** | -0,58 | 0,56 | 0,56 | -0,56 | 0,25 | 0,74 | 0,58 | 0,14 | 0,71 | 0,96 | 0,39 | -0,91 | 0,78 | 0,89 | 0,65 | 0,19 | 0,74 | 0,37 | 0,78 | -0,32 | -0,44 | -0,78 | 0,08 | 1 | 0,42 |
| **FRAP** | -0,97 | 0,17 | 0,16 | 0,40 | -0,77 | 0,36 | 0,28 | -0,05 | 0,39 | 0,29 | -0,19 | -0,26 | 0,51 | 0,28 | 0,54 | -0,60 | 0,91 | -0,17 | 0,52 | -0,95 | -0,67 | -0,88 | -0,87 | 0,42 | 1 |

Abreviations: Api: apigenin; Caf: caffeic acid; Cfa: caftaric acid; Cat: catechin; CQA; chlorogenic acid; Ela: ellagic acid; Epi: epicatechin; Fea: ferulic acid; Gag: gallocatechin gallate; GiA; ginnalin A; Hes: hesperetin; Lut: luteolin; Myr: myricetin; Nar: naringin; OHt: OH-tyrosol; *p*co: *p*-coumaric acid; Que: quercetin; Q3g: quercetin-3-glucoside; Roa: rosmarinic acid; Tea: tessaric acid; Tpi: trans-piceatannol; Vaa: vanillic acid; CYT: cytotoxicity. Pink highlight indicates strong correlation between phytochemicals (r ≥ 0.95).Blue highlight indicates 0.01-0.29 values between compounds and biological properties, considered as positive weak correlation. Yellow highlight indicates 0.03-0.49 values, considered as positive moderate correlation. Green highlight indicates 0.01-0.29 values, considered as positive strong correlation.
